# Supplementary material for: Detection of HIV-1 Neutralizing Antibodies in a Human CD4+/CXCR4+/CCR5+ T-Lymphoblastoid Cell Assay System
Source: PLoS One. 2013 Nov 28;8(11):e77756. doi: 10.1371/journal.pone.0077756 (PMC3842913; doi:10.1371/journal.pone.0077756)
Supplement: Table S1 — IMC nomenclature and characteristics. (XLSX) [file pone.0077756.s002.xlsx]

## Sheet: Sheet1
	Supplementary Table 1: IMC Nomenclature
Key to Fig.1C	Original Nomenclature*	Alternate Nomenclature #1**	Alternate Nomenclature #2***	Envelope Name	Env Clade	Fiebig Stage	Backbone/Clade
1	NL-LucR.T2A-703357.c02.ecto	NL.LucR-703357c02.ecto	703357.c02.IMC.LucR	703357	CRF01_AE	I/II	NL4-3/B
2	NL-LucR.T2A-C1080.c03.ecto	NL.LucR-C1080c03.ecto	C1080.c03.IMC.LucR	C1080	CRF01_AE	VI	NL4-3/B
3	NL-LucR.T2A-C3347.c11.ecto	NL.LucR-C3347c11.ecto	C3347.c11.IMC.LucR	C3347	CRF01_AE	VI	NL4-3/B
4	NL-LucR.T2A-C4118.c09.ecto	NL-LucR.T2A-C4118.c09.ecto	C4118.c09.IMC.LucR	C4118	CRF01_AE	VI	NL4-3/B
5	NL-LucR.T2A-CM235-2.ecto	NL.LucR-CM235.ecto	CM235-2.IMC.LucR	CM235	CRF01_AE	VI	NL4-3/B
6	NL-LucR.T2A-R2184.c04.ecto	NL.LucR-R2184c04.ecto	R2184.c04.IMC.LucR	R2184	CRF01_AE	VI	NL4-3/B
7	NL-LucR.T2A-427299.c12.ecto	NL.LucR-427299c12.ecto	427299.c12.LucR.T2A.ecto	427299	CRF01_AE	I/II	NL4-3/B
8	NL-LucR.T2A-816763.c02.ecto	NL.LucR-816763c02.ecto	816763.c02.LucR.T2A.ecto	816763	CRF01_AE	I/II	NL4-3/B
9	NL-LucR.T2A-C2101.ecto	NL.LucR-C2101.ecto	C2101.LucR.T2A.ecto	C2101	CRF01_AE	VI	NL4-3/B
10	CM235.LucR-356272c02	CM235.LucR-356272c02	356272sga_c02	356272	CRF01_AE	I/II	CM235/CRF01_AE
11	CM235.LucR-427299c12	CM235.LucR-427299c12	427299sga_c12	427299	CRF01_AE	I/II	CM235/CRF01_AE
12	CM235.LucR-620345c02	CM235.LucR-620345c02	620345sga_c02	620345	CRF01_AE	I/II	CM235/CRF01_AE
13	CM235.LucR-644039c01b	CM235.LucR-644039c01b	644039sga_c01b	644039	CRF01_AE	I/II	CM235/CRF01_AE
14	CM235.LucR-703357c02	CM235.LucR-703357c02	703357sga_c02	703357	CRF01_AE	I/II	CM235/CRF01_AE
15	CM235.LucR-816763c02	CM235.LucR-816763c02	816763sga_c02	816763	CRF01_AE	I/II	CM235/CRF01_AE
1	NL-LucR.T2A-Bal.ecto	NL.LucR-Bal.ecto	Bal.LucR.T2A.ecto	BaL	B	VI	NL4-3/B
2	NL-LucR.T2A-1051.C22.ecto	NL.LucR-1051C22.ecto	1051.C22.IMC.LucR	1051	B	II	NL4-3/B
3	NL-LucR.T2A-9020.A13.ecto	NL.LucR-9020A13.ecto	9020.A13.IMC.LucR	9020	B	II	NL4-3/B
4	NL-LucR.T2A-CH106.ecto	NL.LucR-CH106.ecto	CH106.IMC.LucR	CH106	B	II	NL4-3/B
5	NL-LucR.T2A-CH40.ecto	NL.LucR-CH40.ecto	CH40.IMC.LucR	CH40	B	II	NL4-3/B
6	NL-LucR.T2A-CH58.ecto	NL.LucR-CH58.ecto	CH58.IMC.LucR	CH58	B	II/III	NL4-3/B
7	NL-LucR.T2A-CH77.ecto	NL.LucR-CH77.ecto	CH77.IMC.LucR	CH77	B	II	NL4-3/B
8	NL-LucR.T2A-REJO.ecto	NL.LucR-REJO.ecto	REJO.IMC.LucR	REJO	B	V	NL4-3/B
9	NL-LucR.T2A-RHPA.ecto	NL.LucR-RHPA.ecto	RHPA.IMC.LucR	RHPA	B	V	NL4-3/B
10	NL-LucR.T2A-SC22.3C2.ecto	NL.LucR-SC22.3C2.ecto	SC22.3C2.IMC.LucR	SC22.3C2	B	I/II	NL4-3/B
11	NL-LucR.T2A-SF162.ecto	NL.LucR-SF162.ecto	SF162.IMC.LucR	SF162	B	VI	NL4-3/B
12	NL-LucR.T2A-SUMA.ecto	NL.LucR-SUMA.ecto	SUMA.IMC.LucR	SUMA	B	II	NL4-3/B
13	NL-LucR.T2A-THRO.ecto	NL.LucR-THRO.ecto	THRO.IMC.LucR	THRO	B	II	NL4-3/B
14	NL-LucR.T2A-WEAU3-3.ecto	NL.LucR-WEAU3-3.ecto	WEAU3-3.IMC.LucR	WEAU3-3	B	II	NL4-3/B
15	NL-LucR.T2A-WITO.ecto	NL.LucR-WITO.ecto	WITO.IMC.LucR	WITO	B	II	NL4-3/B
16	NL-LucR.T2A-YU2.ecto	NL.LucR-YU2.ecto	YU2.IMC.LucR	YU2	B	VI	NL4-3/B
1	NL-LucR.T2A-MW965.26.ecto	NL.LucR-MW965.26.ecto	MW965.26-LucR.T2A.ecto	MW965	C	VI	NL4-3/B
2	NL-LucR.T2A-Ce1086_B2.ecto	NL.LucR-Ce1086_B2.ecto	Ce1086_B2.LucR.T2A.ecto	Ce1086	C	I/II	NL4-3/B
3	NL-LucR.T2A-Ce0393_C3.ecto	NL.LucR-Ce0393_C3.ecto	Ce0393_C3.LucR.T2A.ecto	Ce0393	C	IV	NL4-3/B
4	NL-LucR.T2A-Ce2010_F5.ecto	NL.LucR-Ce2010_F5.ecto	Ce2010_F5.LucR.T2A.ecto	Ce2010	C	IV	NL4-3/B
5	NL-LucR.T2A-Ce1176_A3.ecto	NL.LucR-Ce1176_A3.ecto	Ce1176_A3.LucR.T2A.ecto	Ce1176	C	I/II	NL4-3/B
6	NL-LucR.T2A-CAP45.2.00.G3.ecto	NL.LucR-CAP45.2.00.G3.ecto	CAP45.2.00.G3.LucR.T2A.ecto	CAP45.2.00	C	IV	NL4-3/B
7	NL-LucR.T2A-Du151.2.ecto	NL.LucR-Du151.2.ecto	Du151.2.LucR.T2A.ecto	Du151.2	C	V	NL4-3/B
8	NL-LucR.T2A-Du422.1.ecto	NL.LucR-Du422.1.ecto	Du422.1.LucR.T2A.ecto	Du422.1	C	V	NL4-3/B
9	ETH2220.LucR-6838v1c55	ETH2220.LucR-6838v1c55	6838v1c55	6838v1	C	I/II	ETH2220/C
10	ETH2220.LucR-6980v0c43	ETH2220.LucR-6980v0c43	6980v0c43-ETH2220LucR.T2A.05	6980v0	C	I/II	ETH2220/C
11	ETH2220.LucR-3728v2c25	ETH2220.LucR-3728v2c25	3728v2c25-ETH2220LucR.T2A.05	3728c2	C	III/IV	ETH2220/C
12	ETH2220.LucR-6838v5c36	ETH2220.LucR-6838v5c36	6838v5c36	6838v5	C	II/III	ETH2220/C
13	ETH2220.LucR-6838v7c2	ETH2220.LucR-6838v7c2	6838v7c2	6838v7	C	V	ETH2220/C
	*Original Published Nomenclature: References 23 & 61 as well as Edmonds, et al; manuscript in preparation
	**Chenine, et al, AIDS Vaccine Conference, 2009 & 2011. This nomenclature was employed throughout the text.
	***Reference 54
